# Supplementary material
Source: PubMed Central journal article supplement (PMC3374374)
Supplement: 97320630008430S1.pdf [file 97320630008430S1.pdf]

## Supplementary material:

**Table 1:** The comprehensive list of the detoxification enzymes -cytochrome P450s (P450s), glutathione-S-transferases (GSTs), and carboxylesterases (CCEs) - of *Culex quinquefasciatus*. The table also shows the total number of genes of each of the gene family that are identified in the present analysis of the *Culex* genome sequence. The P450 enzyme supergene family is divided into four clans, viz. mitochondrial, CYP2, CYP3, and CYP4. Each of the clan is further divided into gene families, namely mitochondrial gene families (CYP12 gene family, 301, 302, 314, 315), CYP2 clan (CYP15, 303, 304, 305, 306, 307), CYP3 clan (CYP6, 9, 329), and CYP4 clan (CYP4, 325 gene families). In the similar way, GST supergene family has been classified into Delta, Epsilon, Sigma, Theta, Omega, Unclassified, and microsomal GST classes. Likewise, the CCE supergene family divided into alpha, beta, Juvenile hormone processing, glutactin, gliotactins, neurologins, and neurotactins (pl. see ref [24-25] for the basis of classification of these supergene families).

| P450s      |            |            |                 | GSTs       | COEs                     |                 |
|------------|------------|------------|-----------------|------------|--------------------------|-----------------|
| CYP 6      | CYP4       | CYP325     | CYP 304         | Delta GSTs | Mitochondrial & secreted | Juvenile        |
| CPIJ000298 | CPIJ014579 | CPIJ006951 | CPIJ017242      | AB443867   | CPIJ000046               | CPIJ002073      |
| CPIJ000299 | CPIJ009468 | CPIJ006950 | CPIJ017243      | AB443867   | CPIJ000047               | CPIJ002075      |
| CPIJ002535 | CPIJ009473 | CPIJ015959 | CPIJ017244      | AB443867   | CPIJ000045               | CPIJ002074      |
| CPIJ002536 | CPIJ009474 | CPIJ017200 | CPIJ017245      | AB443867   | CPIJ000048               | CPIJ013026      |
| CPIJ002537 | CPIJ009475 | CPIJ015954 | CPIJ017246      | CPIJ002663 | CPIJ008749               | CPIJ013027      |
| CPIJ002538 | CPIJ009476 | CPIJ017199 | 5               | CPIJ002675 | CPIJ005694               | CPIJ013028      |
| CPIJ003361 | CPIJ009477 | CPIJ015958 | CYP 307         | CPIJ002674 | CPIJ000051               | CPIJ013029      |
| CPIJ003375 | CPIJ020229 | CPIJ010810 | CPIJ000989      | CPIJ002678 | CPIJ000049               | CPIJ013175      |
| CPIJ003376 | CPIJ009478 | CPIJ015961 | 1               | CPIJ002679 | CPIJ016025               | CPIJ014154      |
| CPIJ003377 | CPIJ015681 | CPIJ015960 | CYP 301         | CPIJ002660 | CPIJ016026               | CPIJ020045      |
| CPIJ003378 | CPIJ006721 | CPIJ015957 | CPIJ008980      | CPIJ000304 | CPIJ015342               | CPIJ007140      |
| CPIJ003389 | CPIJ001886 | CPIJ015963 | 1               | CPIJ002683 | CPIJ004752               | CPIJ009768      |
| CPIJ004410 | CPIJ007188 | CPIJ014730 | CYP 12          | CPIJ002682 | CPIJ007829               | CPIJ015077      |
| CPIJ004411 | CPIJ011127 | 34         | CPIJ010227      | CPIJ010814 | CPIJ016341               | 11              |
| CPIJ005899 | CPIJ001758 | CYP9       | CPIJ010228      | CPIJ002681 | CPIJ007825               | Uncharacterized |
| CPIJ005900 | CPIJ001757 | CPIJ019765 | CPIJ010229      | CPIJ002680 | CPIJ007826               | CPIJ007638      |
| CPIJ005952 | CPIJ010075 | CPIJ010203 | CPIJ010230      | CPIJ002676 | CPIJ016336               | 1               |
| CPIJ005953 | CPIJ008937 | CPIJ014220 | CPIJ010231      | 14         | CPIJ007824               | neurologin      |
| CPIJ005954 | CPIJ008936 | CPIJ014221 | 5               | Epsilon    | CPIJ007827               | CPIJ007493      |
| CPIJ005955 | CPIJ001754 | CPIJ014218 | CYP302          | CPIJ018628 | CPIJ016339               | CPIJ007495      |
| CPIJ005956 | CPIJ001755 | CPIJ012470 | CPIJ010826      | CPIJ018627 | CPIJ007828               | CPIJ012197      |
| CPIJ005957 | CPIJ000293 | CPIJ010542 | 1               | CPIJ018629 | CPIJ016340               | 3               |
| CPIJ005958 | CPIJ000294 | CPIJ010539 | CYP 314         | CPIJ018630 | CPIJ018232               | neurotactin     |
| CPIJ005959 | CPIJ010480 | CPIJ010537 | CPIJ001380      | CPIJ018631 | CPIJ018233               | CPIJ008533      |
| CPIJ008566 | CPIJ016284 | CPIJ010538 | 1               | CPIJ018632 | CPIJ018231               | 1               |
| CPIJ009085 | CPIJ001810 | CPIJ010540 | CYP 315         | CPIJ018625 | CPIJ013679               | gliotactin      |
| CPIJ010858 | CPIJ018943 | CPIJ010541 | CPIJ011843      | CPIJ018624 | 26                       | CPIJ000482      |
| CPIJ011129 | CPIJ017351 | CPIJ010536 | 1               | CPIJ018626 | Microsomal alpha         | 1               |
| CPIJ015223 | CPIJ018854 | CPIJ010544 | 9               | Omega      | CPIJ013917               |                 |
| CPIJ015428 | CPIJ018944 | CPIJ010543 | 1               | CPIJ000031 | CPIJ013918               |                 |
| CPIJ016356 | CPIJ018668 | CPIJ010545 | 1               | 1          | 2                        |                 |
| CPIJ016846 | CPIJ009415 | CPIJ010546 | 32              | Sigma      | Glutactin                |                 |
| CPIJ016847 | CYP325     | CPIJ010175 | CPIJ010547      | CPIJ006160 | CPIJ002786               |                 |
| CPIJ016848 | CPIJ011837 | CPIJ005332 | 1               | 1          | CPIJ002787               |                 |
| CPIJ016849 | CPIJ011838 | CPIJ003082 | Theta           | CPIJ014052 | CPIJ002785               |                 |
| CPIJ016850 | CPIJ011636 | 21         | CPIJ014053      | CPIJ014051 | CPIJ004636               |                 |
| CPIJ016851 | CPIJ011841 | CYP329     | CPIJ014051      | CPIJ014054 | CPIJ004637               |                 |
| CPIJ016852 | CPIJ005683 | CPIJ000655 | CPIJ014054      | CPIJ019572 | 5                        |                 |
| CPIJ016853 | CPIJ005684 | 1          | CPIJ014054      | CPIJ020053 | Beta & pheromone         |                 |
| CPIJ016854 | CPIJ005685 | CYP 306    | CPIJ019572      | CPIJ020053 | CPIJ011169               |                 |
| CPIJ016855 | CPIJ007086 | CPIJ001038 | CPIJ020053      | 6          | CPIJ005122               |                 |
| CPIJ016856 | CPIJ007085 | CPIJ001039 | unclassified    | CPIJ009434 | CPIJ017763               |                 |
| CPIJ016857 | CPIJ007089 | 2          | CPIJ009434      | CPIJ016212 | CPIJ016681               |                 |
| CPIJ017014 | CPIJ007090 | CYP 305    | CPIJ016212      | CPIJ014694 | CPIJ016683               |                 |
| CPIJ017462 | CPIJ007091 | CPIJ014940 | CPIJ014694      | CPIJ018633 | CPIJ019485               |                 |
| CPIJ017609 | CPIJ007093 | CPIJ014941 | CPIJ018633      | 4          | CPIJ016686               |                 |
| CPIJ018494 | CPIJ007092 | CPIJ014942 | microsomal GSTs | CPIJ012756 | CPIJ016685               |                 |
| CPIJ019586 | CPIJ007095 | 3          | CPIJ012756      | CPIJ018241 | 8                        |                 |
| CPIJ019587 | CPIJ009570 | CYP 15     | CPIJ018241      | CPIJ012754 | Acetylcholines           |                 |
| CPIJ019588 | CPIJ009569 | CPIJ014944 | CPIJ012754      | CPIJ012755 | CPIJ000662               |                 |
| CPIJ019589 | CPIJ010272 | 1          | CPIJ012755      | CPIJ015233 | CPIJ006034               |                 |
| CPIJ019703 | CPIJ011835 | CYP 303    | 5               |            | 2                        |                 |
| CPIJ019704 | CPIJ000925 | CPIJ009170 |                 |            |                          |                 |
| CPIJ019751 | CPIJ000929 | 1          |                 |            |                          |                 |

**Table 2a:** Comparative distribution of various gene families or classes of cytochrome p450s, glutathione-S-transferases, and carboxylesterases from sequenced dipteran species. The enzyme data for the *Drosophila*, *Aedes*, and *Anopheles* were retrieved from Claudianos *et. al.* [25] And for *Culex* freshly analyzed data is used.

| Species                                 | <i>D. melanogaster</i> | <i>A. gambiae</i> | <i>A. aegypti</i> | <i>Cx. quinquefasciatus</i> |
|-----------------------------------------|------------------------|-------------------|-------------------|-----------------------------|
| <b>Cytosolic GSTs</b>                   |                        |                   |                   |                             |
| Delta                                   | 11                     | 12                | 9                 | 14                          |
| Epsilon                                 | 14                     | 8                 | 8                 | 9                           |
| Omega                                   | 4                      | 1                 | 1                 | 1                           |
| Sigma                                   | 1                      | 1                 | 1                 | 1                           |
| Theta                                   | 4                      | 2                 | 4                 | 6                           |
| Zeta                                    | 2                      | 1                 | 1                 | 0                           |
| Iota                                    | 0                      | 1                 | 1                 | 1                           |
| Others (unclassified)                   | 0                      | 3                 | 2                 | 3                           |
| Microsomal                              | 0                      | 4                 | 3                 | 4                           |
| <b>Total GSTs</b>                       | <b>36</b>              | <b>33</b>         | <b>30</b>         | <b>39</b>                   |
| <b>Cytochrome P450s</b>                 |                        |                   |                   |                             |
| CYP4                                    | 32                     | 45                | 59                | 66                          |
| CYP3                                    | 36                     | 42                | 84                | 77                          |
| CYP2                                    | 6                      | 10                | 11                | 13                          |
| Mitochondrial CYPs                      | 11                     | 9                 | 10                | 10                          |
| <b>P450 total</b>                       | <b>85</b>              | <b>106</b>        | <b>164</b>        | <b>166</b>                  |
| <b>CCEs</b>                             |                        |                   |                   |                             |
| Mitochondrial & secreted&microsomal     | 13                     | 16                | 22                | 28                          |
| <b>Hormone/semiochemical processing</b> |                        |                   |                   |                             |
| D clade/ integument esterases           | 3                      | 0                 | 0                 | 0                           |
| E clade/ beta esterases                 | 2                      | 4                 | 2                 | 8                           |
| F clade/ juvenile hormone esterases     | 3                      | 10                | 12                | 13                          |
| <b>Neuro/developmental</b>              |                        |                   |                   |                             |
| H clade/ glutactin                      | 5                      | 10                | 7                 | 5                           |
| I clade/ uncharacterized                | 1                      | 1                 | 1                 | 1                           |
| J clade/ acetylcholinesterases          | 1                      | 2                 | 2                 | 2                           |
| K clade/ gliotactins                    | 1                      | 1                 | 1                 | 1                           |
| L clade/ neurologins                    | 4                      | 5                 | 5                 | 3                           |
| M clade/ neurotactins                   | 2                      | 2                 | 2                 | 1                           |
| <b>CCEs total</b>                       | <b>35</b>              | <b>51</b>         | <b>54</b>         | <b>62</b>                   |

**Table 2b:** Comparative distribution of various IR gene families or classes of cytochrome P450s, glutathione-S-transferases, and carboxylesterases from the sequenced dipteran species

|                      | <i>Culex quinquefasciatus</i> | <i>Anopheles gambiae</i> | <i>Aedes aegypti</i> | <i>Drosophila melanogaster</i> |
|----------------------|-------------------------------|--------------------------|----------------------|--------------------------------|
| <b>P450s</b>         | <b>166</b>                    | <b>105</b>               | <b>160</b>           | <b>85</b>                      |
| CYP3 Clan            | 77                            | 36                       | 82                   | 36                             |
| CYP4 Clan            | 66                            | 32                       | 57                   | 32                             |
| Percent contribution | 143 (86%)                     | 68 (64%)                 | 139 (87%)            | 68 (80%)                       |
| <b>GSTs</b>          | <b>40</b>                     | <b>31</b>                | <b>29</b>            | <b>38</b>                      |
| Delta                | 14                            | 12                       | 8                    | 11                             |
| Epsilon              | 9                             | 8                        | 8                    | 14                             |
| Percent contribution | 23 (57%)                      | 20 (66%)                 | 16 (55%)             | 25 (66%)                       |
| <b>Esterases</b>     | <b>62</b>                     | <b>51</b>                | <b>49</b>            | <b>35</b>                      |
| Alpha class          | 28 (50%)                      | 16 (30%)                 | 22 (40%)             | 13 (40%)                       |
